# Supplementary material
Source: publisher figshare collection journal article supplement (https://gsajournals.figshare.com/ndownloader/files/39519271)
Supplement: Supplementary file 1 [file 39519271]

#NEXUS
begin taxa;
	dimensions ntax=18;
	taxlabels 
		'wRec Metcalf2014'
		'DTristis CM2'
		'wPan P1 Turelli2018'
		'wAna Salzberg2005'
		'wMel Wu2004'
		'wHa Ellegaard2013'
		'wMau Meany2019'
		'wAura Turelli2018'
		'wTria Turelli2018'
		'DLeontia L1'
		'DBocki L1'
		'DBicornuta L1'
		DSeguyi
		'DCurta L1'
		'DNikananu L2'
		'DBurlai L1'
		'DChauvacae L1'
		'DBaimaii L2'
		;
end;
begin trees;
	translate 
		1 'wRec Metcalf2014',
		2 'DTristis CM2',
		3 'wPan P1 Turelli2018',
		4 'wAna Salzberg2005',
		5 'wMel Wu2004',
		6 'wHa Ellegaard2013',
		7 'wMau Meany2019',
		8 'wAura Turelli2018',
		9 'wTria Turelli2018',
		10 'DLeontia L1',
		11 'DBocki L1',
		12 'DBicornuta L1',
		13 DSeguyi,
		14 'DCurta L1',
		15 'DNikananu L2',
		16 'DBurlai L1',
		17 'DChauvacae L1',
		18 'DBaimaii L2'
		;
	tree tree1 = [&r](1:0.091652,(2:0.106461,((3:0.006592,4:0.009454):0.109134,(5:0.014709,(6:0.007689,7:0.005452):0.005001):0.095321,((8:0.00703,9:0.005831):0.024211,(((10:0.006251,11:0.007813):0.023754,(12:0.034136,(13:0.020275,14:0.016844,(15:0.013773,(16:0.007965,17:0.006537):0.00719):0.003555):0.013829):0.003216):0.014605,18:0.067278):0.006808):0.039095):0.05927):0.091652);
end;
